# Supplementary material for: Global and National CO 2 Uptake by Cement Carbonation from 1928 to 2024
Source: Copernicus journal article supplement (doi:10.5194/essd-2024-437), 2024-11-25
Supplement: Supplementary file [file essd-2024-437-CC2-supplement.pdf]

# Global and National CO<sub>2</sub> Uptake by Cement Carbonation from 1928 to 2024

Le Niu<sup>1,2,†</sup>, Songbin Wu<sup>1,2,†</sup>, Robbie M. Andrew<sup>3</sup>, Zi Shao<sup>5,8</sup>, Jiaoyue Wang<sup>1,6,7</sup>, and Fengming Xi<sup>1,4,6,7,\*</sup>

<sup>1</sup>Institute of Applied Ecology, Chinese Academy of Sciences, Shenyang 110016, China

5 <sup>2</sup>University of Chinese Academy of Sciences, Beijing, 100049, China

<sup>3</sup>CICERO Center for International Climate Research, Oslo 0349, Norway

<sup>4</sup>Institute of Mineral Resources, University of Science and Technology Beijing, Beijing, 100083, China

<sup>5</sup>Department of Geography, The University of Hong Kong, Hong Kong SAR, China

10 <sup>6</sup>Key Laboratory of Pollution Ecology and Environmental Engineering, Chinese Academy of Sciences, Shenyang, 110016, China

<sup>7</sup>Key Laboratory of Terrestrial Ecosystem Carbon Neutrality, Liaoning Province, Shenyang, 110016, China

<sup>8</sup>Institute for Climate and Carbon Neutrality, University of Hong Kong, Hong Kong SAR, China

† These authors contributed equally to this work.

\*Correspondence to: Fengming Xi (xifengming@ustb.edu.cn)

15 **Abstract.** The hydration products of cement materials can absorb atmospheric CO<sub>2</sub>, and this carbonation process provides an important decarbonization pathway for the cement industry. Global carbon sequestration by cement materials has been reported, but carbon uptake in different countries remains unquantified. Here, we quantify the national cement carbon uptake from 1928 to 2023 based on 58517 activity level data from 163 cement-producing countries and regions worldwide and 6186 carbonation parameters from detailed data records of 42 countries, and project their trend to 2024. The global CO<sub>2</sub> uptake by cement  
20 materials increases from 7.74 Mt yr<sup>-1</sup> (95 % confidence interval, CI: 5.84-9.85 Mt CO<sub>2</sub> yr<sup>-1</sup>) in 1928 to 0.84 Gt yr<sup>-1</sup> (95 % CI: 0.71-1.00 Gt yr<sup>-1</sup>) in 2023, and projected to rise to 0.86 Gt yr<sup>-1</sup> (95% CI: 0.73-1.02 CO<sub>2</sub> yr<sup>-1</sup>) in 2024. The accumulated CO<sub>2</sub> uptake from 1928 to 2023 is 21.26 Gt CO<sub>2</sub> (95% CI: 17.93-25.17 Gt CO<sub>2</sub>), which offsets about 46 % of the cement process emission (46.06 Gt CO<sub>2</sub>) in past 96 years. Simultaneously, the dominance in cement carbon uptake has shifted from the USA, Japan and some European countries to emerging economies such as China and India, which account for 38.0 % and 9.1 % of  
25 total CO<sub>2</sub> uptake, respectively, in the last decade (2014-2023). By analysing the long time-series carbon emission and uptake of the 42 countries with detailed data, we find they contributed 82.1 % of global cement CO<sub>2</sub> uptake from 1928 to 2023, including 21 peaked countries and 21 non-peaked countries in cement emissions. The annual carbon offset level (the ratio of uptake to process emission in a given year) shows a remarkable decrease due to the temporal lag of cement carbon uptake. This is significant for countries with higher cement imports, for example, the cement industry in Australia and Japan have  
30 achieved net-zero when considering the cement carbonation sink. This study provides a precise bottom-up quantification to cement carbonation sinks at national and global levels. All the data described in this study are accessible at <https://doi.org/10.5281/zenodo.13827861> (Wu et al., 2024).

## 1 Introduction

The global cement industry is the third largest source of difficult-to-eliminate CO<sub>2</sub> emissions, after load-following electricity and iron and steel (Davis et al., 2018; Shah et al., 2022), accounting for up to 8 % of anthropogenic CO<sub>2</sub> emissions (Cheng et al., 2023; Farfan et al., 2019). Cement production CO<sub>2</sub> emissions arise from fossil energy inputs (about 40 %) and calcination of carbonates (mostly CaCO<sub>3</sub>) induced process emission (about 60 %). As the largest source of carbonate decomposition emissions, global cement production process emissions in 2023 were about 1.6 Gt CO<sub>2</sub> (Andrew, 2019, <https://zenodo.org/records/11207133>). Conversely, cement products such as concrete and mortar are important CO<sub>2</sub> sinks because of their capacity to react with environmental CO<sub>2</sub> (Snæbjörnsdóttir et al., 2020). The carbonation mechanism of cement is mainly attributed to alkaline hydration products (Xue et al., 2021), such as calcium hydroxide [Ca(OH)<sub>2</sub>], calcium silicate [(CaO)<sub>3</sub> · xSiO<sub>2</sub>] and calcium aluminate [CaO · xAl<sub>2</sub>O<sub>3</sub>], as described by the following equations (Goyal and Sharma, 2020):

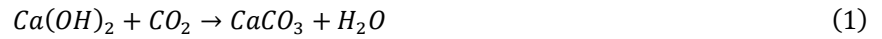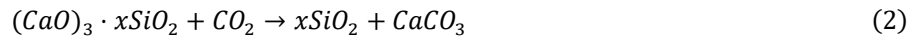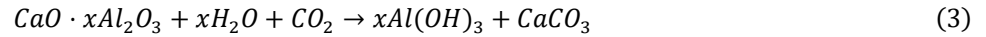

A substantial fraction of process CO<sub>2</sub> emissions from cement production is reabsorbed on a time scale of 50 years through natural carbonation of cement materials (Xi et al., 2016). This mineral carbonation could be applied as a low-carbon cement and concrete production technology, and provide a pathway for permanent CO<sub>2</sub> sequestration (Li et al., 2022).

Carbonation is a crucial pathway for achieving net-zero emissions for the cement industry. Although studies have demonstrated the significant reduction of CO<sub>2</sub> emissions through the use of industrial by-products as substitutes for raw materials (Coffetti et al., 2022; Kurtis, 2015) and the use of alternative fuels to meet the energy needs (de Lorena Diniz Chaves et al., 2021), carbon sequestration of cement carbonation plays an essential role to reach the net-zero emission goal for the cement industry. Therefore, there is an urgent need to scientifically quantify the contribution of cement carbonation in the decarbonization efforts of the cement industry. Currently, the Roadmap to Carbon Neutrality, published by the Portland Cement Association of the United States (PCA, 2024), highlights that buildings can reabsorb up to 10% of the CO<sub>2</sub> emitted during the cement and concrete production process, and it underscores the significance of recognizing and validating cement carbonation. The European Cement Association (CEMBUREAU, 2024) has proposed a cement net-zero ambition by 2050, with mineral carbonation contributing about 6.4% (74kg CO<sub>2</sub>/t reduction) to achieving this emissions goals. The report indicated explicitly that the CO<sub>2</sub> absorption facilitated by concrete structures and infrastructure should be incorporated into national greenhouse gas inventories. In addition, the estimates of cement carbon uptake are used by the Global Carbon Budget (Friedlingstein et al., 2023) as an important part of anthropogenic carbon sink for modelling of the annual global carbon cycle. Therefore, it is imperative that these uptake estimates are as precise as possible.

65 However, due to the lack of detailed activity data and precise carbonation parameters for various countries, there is still a gap in national-scale accounting of cement carbon uptake. Cement consumption, influenced by international trade, provides the activity level data for estimating carbon sequestration (Ambec et al., 2024). In previous accounting, cement production was used as a proxy for consumption (Xi et al., 2016). However, while that is sufficient at the global level – since production and consumption are almost equal globally - to achieve more accurate results at the country level it is imperative to collect more precise activity data on cement consumption with improved spatial resolution. To establish a national cement carbon sink database, it is essential to refine cement carbonation parameters at the national level, including cement type, exposure conditions, and building lifespan, which directly impact cement carbonation properties.

70 Many studies have made great contributions to a better understanding of cement carbon emissions. Andrew (2019) provided a long time series global cement carbon emissions database by calibrating carbon emissions from cement production processes across various countries. Cheng et al. (2023) offered bottom-up quantifications of emissions in developing countries. Some studies accounted for cement emissions and proposed reduction strategies, particularly in major emitters like China (Doh Dinga and Wen, 2022; Liu et al., 2021) and India (Krishna Priya et al., 2024). Nonetheless, the corresponding carbon sequestration accounting for cement with the same accuracy has not yet been established. It is therefore imperative to enhance the spatial resolution of the cement carbon uptake database to understand the specifics of cement carbon sinks and their contributions to emission reductions across different countries.

80 This study is the fourth update of the Global Cement Carbon Uptake Database, providing a detailed bottom-up quantification and revealing a shift in the main countries contributing to global cement CO<sub>2</sub> uptake. Key updates compared to previous versions are: (1) Global cement carbon uptake is now calculated as the sum of 163 countries and regions, offering a more comprehensive view than the previous coarse-scale partition summation. (2) To reduce accounting uncertainty, we have shifted from using cement clinker production to apparent consumption as the activity level data for national cement carbon sequestration accounting. (3) We have updated national-level cement carbonation parameters to improve accounting accuracy, including factors such as cement utilization type, concrete strength class, and concrete exposure time. (4) The database has been updated to include time series from 1928 to 2023, with projected cement carbon uptake for 2024 aligning with the latest Global Carbon Budget. (5) This update also highlights the cement carbon sequestration characteristics at national-level and their carbon offset levels to process emission.

## 2 Methods and data sources

### 90 2.1 Data source and treatment

In this study, national cement clinker production data and emission factors were used to calculate carbon emissions from cement production processes. The cement clinker production data for 163 countries and regions were obtained from two sources: (1) Direct cement clinker production data submitted to the United Nations Framework Convention on Climate Change (UNFCCC) by 43 countries. (2) Estimated cement clinker production data, which were based on cement clinker ratios and cement production for 163 countries and regions from 1928 to 2022 obtained from USGS. For the year 2023, the cement production data was updated from the CCF2Up database website (<https://ccf2up.com/>). For countries lacking updated data for 2023 and all countries in 2024, projections were made based on historical data (see Sect. 2.3 for forecasting methods). The cement clinker ratio data for China and India aligned with our prior research (Xi et al., 2016; Guo et al., 2021; Huang et al., 2023). For other countries, the ratios are estimated using the methods outlined by Andrew (2020), with taking 95% cement clinker ratio for the years before 1970 and employing linear interpolation to estimate the ratio for the period after 1970, based on an assumption of steady increases in clinker substitution over time. Country-specific cement emission factors are obtained from the UNFCCC for 43 countries. For those not listed in the database, the default value of 0.507 kg CO<sub>2</sub>/t clinker provided by the IPCC was used.

To provide a more precise national-level database of carbon uptake in cement, the following data updates have been made in this study based on previous work, incorporating the following modifications: (1) Cement consumption for 163 countries and regions. Cement consumption in different countries was adjusted using import and export data for cement clinker based on the cement production data collected and estimated for each country. (2) Cement utilization proportion in concrete and mortar for 42 countries. Statistics on the types of cement utilized in European countries were sourced from the European Ready-Mixed Concrete Industry (ERMCO, 2019). Data for South Africa (Muigai et al., 2013), India (Kumar and Kaushik, 2003) and Thailand were collected from the literatures. For China and the USA, the data remains consistent with previous work. (3) Concrete strength class for 42 countries. For European countries, concrete strength class data were derived and updated from ERMCO statistics (ERMCO, 2019). For other countries like Brazil, Egypt, South Africa, Saudi Arabia, India, Malaysia, Thailand, and the UAE, the concrete categories were estimated based on building types from CEIC Data (CEIC, 2024). (4) Building lifespan for 42 countries. This factor determines the exposure time of concrete during service, and actual statistics were prioritized for carbon uptake calculation, followed by engineering design data, and last for model simulation when both are unavailable (Ji et al., 2021). Altogether, there are 58517 activity level data for 163 cement-producing countries and regions worldwide, and 6186 carbonation parameters for 42 countries were updated and enriched in the calculate model of global

cement carbon uptake. The detailed activity level data and carbonation parameters are in Supplementary table 1-2 (available from <https://doi.org/10.5281/zenodo.13827861> Wu et al., 2024).

## 120 2.2 Estimating for cement process CO<sub>2</sub> emissions

The methodology recommended by IPCC is widely used for estimating CO<sub>2</sub> emissions from industrial processes. In this study, we used Tier 2 method to estimate country-specific emissions (Eq. 4):

$$E_{process,i} = P_{cement,i} \times f_{clinker,i} \times EF_{CO_2,i} \quad (4)$$

125 where  $E_{process,i}$  represents process CO<sub>2</sub> emissions from cement industry in country  $i$ ;  $P_{cement,i}$  refers to weight (mass) of cement produced,  $f_{clinker,i}$  is clinker-to-cement ratios,  $EF_{CO_2,i}$  is the country-specific emission factor for clinker.

## 2.3 Estimating for cement CO<sub>2</sub> uptake

We employ national geographic boundary as the accounting boundary for cement carbon uptake, aligning with the accounting methods for carbon emissions from cement production. The accounting model for cement CO<sub>2</sub> uptake (Table 1) in this study adheres to the model constructed in our prior research, which can be summarized as follows:

$$130 \quad C = W \times f \times \gamma \times F \times M \quad (5)$$

$$W = P_{clinker} - Ex + Im \quad (6)$$

$$F = d/D \quad (7)$$

$$d = k \times \sqrt{t} \quad (8)$$

$$k = \beta_{csec} \times \beta_{ad} \times \beta_{CO_2} \times \beta_{cc} \quad (9)$$

135 The cement carbon uptake ( $C$ ) obtained by combining the clinker consumption ( $W$ ) with proportion of CaO in cement clinker ( $f$ ), fraction of CaO converted to CaCO<sub>3</sub> of cement material ( $\gamma$ ), annual carbonation ratio ( $F$ ) and molar ratio (Eq. 5). Where  $W$  is adjusted by clinker production ( $P_{clinker}$ ) with its exports ( $Ex$ ) and imports ( $Im$ ) (Eq. 6).  $F$  is the ratio of carbonation depth ( $d$ ) to total thickness ( $D$ ) (Eq. 7).  $d$  is the carbonation depth over a certain period of time ( $t$ ) that can be calculated by Fick's second law of diffusion (Eq. 8).  $k$  represents carbonation rates, which is calibrated by exposure conditions ( $\beta_{csec}$ ), cement additives ( $\beta_{ad}$ ), CO<sub>2</sub> concentration ( $\beta_{CO_2}$ ) and coating and cover ( $\beta_{cc}$ ) (Eq. 9).

140 Considering the carbon uptake mechanism of cement in different life cycles, cement carbon uptake has been categorized into four types: (1) concrete use, (2) mortar use, (3) construction-loss, and (4) cement kiln dust (CKD) landfills. For concrete, the carbon uptake takes into whole life cycle of concrete service, demolition, and secondary-use. For cement mortar, there are comprise three kinds of use: rendering and plastering mortar, maintenance and repairing mortar, and masonry mortar. Concrete and mortar loss are both carbon sinks for construction-loss cement. The carbon uptake of CKD occurs during landfill disposal.

Table 1 lists the carbon sequestration accounting equations for different cement materials.

**Table 1: Accounting Model for Cement CO<sub>2</sub> uptake**

| Cement type  | Disposal method<br>or Life stages   | Accounting formula                                                                                                                                                                                                                                                                                                                                                                                                                                                                                               |
|--------------|-------------------------------------|------------------------------------------------------------------------------------------------------------------------------------------------------------------------------------------------------------------------------------------------------------------------------------------------------------------------------------------------------------------------------------------------------------------------------------------------------------------------------------------------------------------|
| (1) Concrete |                                     | $C_{li} = W_{li} \times F_{li} \times f_{clinker} \times f_{cao} \times \gamma \times \frac{M_{CO_2}}{M_{CaO}}$                                                                                                                                                                                                                                                                                                                                                                                                  |
|              | Service                             | $F_{li} = d_{li}/D_{li}$<br>$d_{li} = 2k_{li} \times \sqrt{t_i}$                                                                                                                                                                                                                                                                                                                                                                                                                                                 |
|              | Demolition                          | $C_d = W_{di} \times F_{di} \times f_{cao} \times \gamma \times \frac{M_{CO_2}}{M_{CaO}}$<br>$F_{di} = \begin{cases} 100\% - \frac{\int_a^b \frac{\pi}{6} (D - D_{di})^3}{\int_a^b \frac{\pi}{6} D^3} \times 100\%, & (a > D_{di}) \\ 100\% - \frac{\int_{D_{di}}^b \frac{\pi}{6} (D - D_{di})^3}{\int_a^b \frac{\pi}{6} D^3} \times 100\%, & (a \leq D_{di} < b) \\ 100\%, & (b \leq D_{di}) \end{cases}$<br>$D_{di} = 2d_{di} = 2k_{di} \times \sqrt{t_d}$                                                     |
|              | Secondary-use                       | $C_s = W_{si} \times F_{si} \times f_{cao} \times \gamma \times \frac{M_{CO_2}}{M_{CaO}}$<br>$F_{si} = \begin{cases} 100\% - \frac{\int_a^b \frac{\pi}{6} (D - D_{si})^3}{\int_a^b \frac{\pi}{6} D^3} \times 100\% - F_{di}, & (a > D_{si}) \\ 100\% - \frac{\int_{D_{si}}^b \frac{\pi}{6} (D - D_{si})^3}{\int_a^b \frac{\pi}{6} D^3} \times 100\% - F_{di}, & (a \leq D_{si} < b) \\ 100\% - F_{di}, & (b \leq D_{si}) \end{cases}$<br>$D_{si} = 2d_{ti} = 2k_{si} \times \sqrt{t_{si} + t_{di} + \Delta t_i}$ |
| (2) Mortar   | Rendering and<br>plastering mortar  | $C_{rpt} = \sum_0^t W_m \times r_{rp} \times f_{rpt} \times f_{clinker} \times f_{cao} \times \gamma_1 \times \frac{M_{CO_2}}{M_{CaO}}$<br>$f_{rpt} = \frac{d_{rpt} - d_{rp(t-1)}}{d_{Trp}} \times 100\%$<br>$d_{rp} = K_m \times \sqrt{t}$                                                                                                                                                                                                                                                                      |
|              | Maintenance and<br>repairing mortar | $C_{rmt} = \sum_0^t W_m \times r_{rr} \times f_{rmt} \times f_{clinker} \times f_{cao} \times \gamma_1 \times \frac{M_{CO_2}}{M_{CaO}}$<br>$f_{rmt} = \frac{d_{rmt} - d_{rm(t-1)}}{d_{Tmp}} \times 100\%$<br>$d_{rm} = K_m \times \sqrt{t}$                                                                                                                                                                                                                                                                      |
|              | Masonry mortar                      | $C_{rmat} = \sum_{i=0}^2 W_m \times r_{rm} \times r_{rmat-i} \times f_{rmat-i} \times f_{clinker} \times f_{cao} \times \gamma_1 \times \frac{M_{CO_2}}{M_{CaO}}$<br>$f_{rmat-0} = \begin{cases} \frac{2(d_{rmat-0} - d_{ram(t-1)-0})}{d_w} \times 100\%, & (t \leq t_r) \\ 100\% - 2d_{rmat-0-sl}/d_w \times 100\%, & (t_r \leq t \leq t_{sl}) \end{cases}$                                                                                                                                                     |

$$d_{rmat-0} = 2K_m \times \sqrt{t}$$

$$f_{rmat-1} = \begin{cases} \frac{d_{rmat-1} - d_{ram(t-1)-1}}{d_w} \times 100\%, & (t_r \leq t \leq t_{sl}) \\ 100\% - \frac{(2d_{rmat-1-sl} - 2d_{Trp})}{d_w} \times 100\%, & (t = t_{sl} + 1) \end{cases}$$

$$d_{rmat-1} = \begin{cases} K_m \times \sqrt{t}, & (t \leq t_r) \\ K_m \times \sqrt{t} + (K_m \times \sqrt{t} - d_{Trp}), & (t_r \leq t \leq t_{sl}) \\ 0, & (t \leq t_r) \end{cases}$$

$$f_{rmat-2} = \begin{cases} \frac{d_{rmat-2} - d_{ram(t-1)-2}}{d_w} \times 100\%, & (t_r \leq t \leq t_{sl}) \\ 100\% - \frac{(d_{rmat-2-sl} - 2d_{Trp})}{d_w} \times 100\%, & (t = t_{sl} + 1) \end{cases}$$

$$d_{rmat-2} = \begin{cases} 0, & (t \leq t_r) \\ 2(K_m \times \sqrt{t} - d_{Trp}), & (t > t_r) \end{cases}$$

|                       |                |                                                                                                                                                                 |
|-----------------------|----------------|-----------------------------------------------------------------------------------------------------------------------------------------------------------------|
| (3) Construction-loss | Waste concrete | $C_{wastecon} = \left( \sum_1^n W_{ci} \times f_{con} \times r_{con} \right) \times f_{clinker} \times f_{CaO} \times \gamma \times \frac{M_{CO_2}}{M_{CaO}}$   |
|                       | Waste mortar   | $C_{wastemor} = \left( \sum_1^n W_{mi} \times f_{mor} \times r_{mor} \right) \times f_{clinker} \times f_{CaO} \times \gamma_1 \times \frac{M_{CO_2}}{M_{CaO}}$ |
| (4) CKD               | Landfill       | $C_{CKD} = W_{clinker} \times r_{CKD} \times r_{landfill} \times f_{CaO} \times \gamma_2 \times \frac{M_{CO_2}}{M_{CaO}}$                                       |

**Annotation:** (1) Concrete:  $W_{li}$ ,  $W_{di}$ ,  $W_{si}$ : cement consumption for  $i$  grade strength concrete in the construction services, demolition and secondary use phases;  $F_{li}$ ,  $F_{di}$ ,  $F_{si}$ : carbonization ratio for  $i$  grade strength concrete in the construction services, demolition and secondary use phases;  $D$ : particle size of concrete debris in the demolition phase of construction;  $D_{li}$ : Wall thickness during concrete service;  $D_{di}$ ,  $D_{si}$ : maximum particle size of  $i$  grade strength concrete for complete carbonization in the construction demolition and secondary use phases;  $a$ ,  $b$ : maximum and minimum particle size of waste concrete debris;  $d_{li}$ ,  $d_{di}$ ,  $d_{si}$ : carbonation depth of  $i$  grade strength concrete in the construction services, demolition and secondary use phases;  $k_{li}$ ,  $k_{di}$ ,  $k_{si}$ : carbonation rate of  $i$  grade strength concrete in the construction services, demolition and secondary use phases;  $t_l$ ,  $t_d$ ,  $t_{si}$ ,  $t_{di}$ ,  $\Delta t_i$ : use time of  $i$  grade strength concrete buildings, exposure time during the demolition phase, secondary use time of burial, and carbonation lag time for burial;  $f_{CaO}$ : proportion of CaO in cement clinker;  $\gamma$ : fraction of CaO converted to CaCO<sub>3</sub> of concrete;  $M_{CO_2}$ ,  $M_{CaO}$ : molar mass of CO<sub>2</sub> and CaO.

(2) Mortar:  $W_m$ : cement consumption for mortar;  $r_{rp}$ ,  $r_{rr}$ ,  $r_{rm}$ : proportion of mortar used for rendering and plastering, maintenance and repairing, masonry;  $r_{rmat-i}$ : proportion of masonry mortar that does not have plaster ( $i=0$ ), plaster on one side ( $i=1$ ) and plaster on both sides ( $i=2$ );  $f_{rpt}$ ,  $f_{rmt}$ ,  $f_{rmat-i}$ : carbonization ratio in year  $t$  for three mortars;  $\gamma_1$ : fraction of CaO converted to CaCO<sub>3</sub> of mortar;  $d_{rpt}$ ,  $d_{rmt}$ ,  $d_{rmat-i}$ : carbonation depth of different types mortar in year  $t$ ;  $d_{rpt(t-1)}$ ,  $d_{rmt(t-1)}$ ,  $d_{rmat(t-1)-i}$ : carbonation depth of different types mortar in year  $t-1$ ;  $d_{Trp}$ ,  $d_{Tmp}$ ,  $d_w$ : thickness of mortar used for

rendering and plastering, maintenance and repairing, masonry;  $K_m$ : carbonation rate of mortar;  $t$ : mortar exposure time;  $t_r$ : time required for complete carbonation of plaster mortar at thickness.

165 (3) Construction-loss:  $W_{ci}$ ,  $W_{mi}$ : cement consumption for  $i$  grade strength concrete and mortar;  $f_{con}$ ,  $f_{mor}$ : loss rate of concrete and mortar during the construction phase;  $r_{con}$ ,  $r_{mor}$ : carbonation ratio of lost concrete and lost mortar during the construction phase.

(4) CKD:  $W_{clinker}$ : cement clinker production;  $r_{CKD}$ : production rate of CKD;  $r_{landfill}$ : proportion of cement kiln ash used for landfill disposal;  $\gamma_2$ : fraction of CaO converted to CaCO<sub>3</sub> of CKD

## 170 2.4 Projection of 2024 cement uptake

We provide a projection of cement **process** carbon emission and uptake for 163 countries and regions in the year 2024. We use the autoregressive integrated moving average model, or ARIMA (p, d, q), a time-series analysis method commonly used for yield forecasting. This regression-based model forecasts values by regressing the variable's past values using various lag lengths, along with the current and past values of the error term (Cox and Vladescu, 2023). Based on extensive long-term  
175 cement production data spanning from 1928 to 2023 for 163 countries and regions, we use the ARIMA model to forecast cement production for the year 2024. Our forecasts are further validated by industry economic reports from major cement-producing nations. For example, 2023 Cement Industry Economic Operation Report published by the China Cement Association (CCA, 2024) considers upstream raw materials prices and the downstream real estate market, projecting a 2-3% decline in cement production by 2024. This prediction aligns with our model's 2.1% decline. Similarly, for United States, the  
180 USGS provided monthly data on cement production, showing a 4% year-over-year decline in the first half of 2024 that is consistent with our model's trend prediction. The 2024 cement clinker consumption data is adjusted based on import and export data in recent years and used to forecast cement carbon uptake in 2024.

## 2.5 Uncertainty analysis

We employed the Monte Carlo method suggested by the IPCC to simulate the cement carbon emission and uptake 10,000  
185 times to assess the uncertainty in cement production process emissions and carbon sequestration in cement materials. **The results of uncertainty accounting are in Supplementary table 4 (available from <https://doi.org/10.5281/zenodo.13827861> Wu et al., 2024).** We identified 24 variables that contribute to uncertainty in cement carbon uptake. This count is two less than previous version due to the revised cement clinker production and cement clinker ratio. The 24 variables include: 3 variables related to cement clinker, namely CaO content, MgO content, and the proportion of CaO converted to CaCO<sub>3</sub>; 10 variables for  
190 concrete, including strength class, proportion of cement for concrete, carbonation rate, building lifespan, particle size distribution, demolition exposure time, and correction factor; 6 variables for mortar, including proportion of cement for mortar,



type of utilization, mortar thickness, and carbonation rate; 2 variables for building loss, including utilization ratio and carbonation period; and 3 variables for CKD, including production rate, landfill ratio, and CaO content.

Compared to our previous study, this study reduces the uncertainty of global cement carbon uptake estimations. The improvements in accuracy are reflected in three aspects: (1) The activity level data used in this study is based on the annual apparent consumption of cement clinker in each country, which is adjusted by the international trade (import/export) of clinker. This updated national level activity data reduces the uncertainty range of [-30.0%, 30.6%] in previous estimations, which arose due to the approximated substitution of cement production data for consumption data. (2) The cement clinker ratios used in the previous versions were based on IPCC guideline-recommended values (86%, with an uncertainty range of [75%, 97%]), while in this study we have refined the cement clinker ratio by conducting annual fitting for each country, which further reduces the uncertainty. (3) We updated the country-specific cement carbonation parameters, including cement utilization proportion in concrete and mortar, concrete strength classes, building service life, which greatly improved the accuracy compared to using global clustered parameters for carbon uptake calculation in our previous reports.

### 3 Results and Discussions

#### 3.1 Global cement carbon emission and uptake

**Global cement process emissions and carbon uptake.** Global cement process emissions have increased from 34.58 Mt CO<sub>2</sub> yr<sup>-1</sup> in 1928 to 1.58 Gt CO<sub>2</sub> yr<sup>-1</sup> in 2023, with an average annual growth rate of 4.1 %, and a cumulative emission of 46.07 Gt CO<sub>2</sub> over past 96 years (Fig. 1a). The increase of global cement process emission is closely linked to the significant expansion in cement clinker production, which increased 45-fold since 1928, with an average annual growth rate of 4.1 %. Correspondingly, global carbon uptake by cement has increased from 7.74 Mt CO<sub>2</sub> yr<sup>-1</sup> (95 % CI: 5.84-9.85 Mt CO<sub>2</sub> yr<sup>-1</sup>) in 1928 to 0.84 Gt CO<sub>2</sub> yr<sup>-1</sup> (95 % CI: 0.71-10.03 Gt CO<sub>2</sub> yr<sup>-1</sup>) in 2023. Notably, 79.2 % of cement carbon sinks occurred since 1990. The total amount of CO<sub>2</sub> uptake by cement over the years is estimated to be 21.26 Gt CO<sub>2</sub> (95 % CI: 17.93-25.17 Gt CO<sub>2</sub>), indicating that cement has reabsorbed approximately 46.1 % of the process emissions from its production process. Unsurprisingly, the carbon offset level (uptake-to-emission ratio, Fig. 1b) tends to increase when cement production decreases. For instance, during the Second World War in 1944, when global cement clinker production declined by 28.2 %, the carbon offset level rose to 45.0 %, an increase of 15.8 % compared to the previous year. Conversely, periods of rapid growth in cement process carbon emissions, such as the period between 2000 and 2007, which saw an average annual growth rate of 7.0 % in cement clinker production due to accelerated urbanization and industrialization, witnessed a decline in the carbon offset level at an average annual rate of 0.7 %. This trend is primarily due to the temporal lag of cement carbonation, such that much of the carbonation occurs in the years following the cement's production. **The results show that global cement carbon uptake in**

2022 is 0.82 Gt CO<sub>2</sub> (95 % CI: 0.69-0.98 Gt CO<sub>2</sub> yr<sup>-1</sup>), a decrease of 1.1 % from 2021. It mainly attributable to the decline in both global cement production and apparent cement consumption in 2022, which decrease by 5.6 % and 6.2 % from 2021, respectively. In particular, as the largest cement producer, China's cement production and apparent consumption decreased by 11.1%. In 2023, global cement carbon uptake shows a 2.8 % increase from 2022, in which the global cement production declined by 1.4 %, but the apparent consumption of cement clinker increased by 2.0 %. This suggests a strong correlation between cement carbon uptake and cement consumption. A modest recovery in global cement consumption is anticipated for 2024, primarily driven by rapidly growing markets in South-East Asia and Africa (Cheng et al., 2023). This recovery is expected to correspond with a continuation of growth in the global cement carbon uptake, which is forecasted to reach 0.86 Gt CO<sub>2</sub> (95 % CI: 0.73-10.23 Gt CO<sub>2</sub> yr<sup>-1</sup>), marking an increase of 2.0% from the 2023 levels.

**Global carbon uptake by different cement products.** The carbon uptake of all cement material types increased steadily (Fig. 1c). Mortar is the most important cement product for CO<sub>2</sub> sequestration, with an average annual uptake of 0.37 Gt yr<sup>-1</sup> (95 % CI: 0.32-0.42 Gt CO<sub>2</sub> yr<sup>-1</sup>) in last decade (2014-2023), accounting for 48.0 % of the total (Fig. 1d). This is largely explained by mortar's much higher surface-to-volume ratio than concrete's. Since 1928, mortar's CO<sub>2</sub> uptake has increased from 4.64 Mt yr<sup>-1</sup> (95 % CI: 3.55-5.95 Mt yr<sup>-1</sup>) to 0.39 Gt yr<sup>-1</sup> (95 % CI: 0.34-0.44 Gt yr<sup>-1</sup>), with an average annual growth rate of 4.7 %. The CO<sub>2</sub> uptake by concrete also played a significant role, with an average annual uptake of 0.32 Gt yr<sup>-1</sup> in the last decade, contributing to 41.5 % of the total. Its uptake increased from 1.43 Mt yr<sup>-1</sup> (95 % CI: 1.11-1.67 Mt yr<sup>-1</sup>) in 1928 to 0.37 Gt yr<sup>-1</sup> (95 % CI: 0.31-0.45 Gt yr<sup>-1</sup>) in 2023, with an average annual growth rate of 6.0 %. CKD and construction-loss cement absorbed respectively 0.05 and 0.025 Gt CO<sub>2</sub> yr<sup>-1</sup> in last decade, contributing 7.2 % and 3.3 % of the total carbon uptake, with average annual growth rates of 4.1 % and 4.4 % from 1928 to 2023. We project that mortar, concrete, CKD, and construction-loss in 2024 will absorb 0.40, 0.38, 0.06, and 0.027 Gt CO<sub>2</sub> yr<sup>-1</sup>, respectively. From the share of carbon sinks by different cement materials, we find that the share of concrete carbon uptake has similar trend with carbon offset level (Fig. 1b). Notably, concrete is the main material contributing to the time-lag effect of cement carbon sinks due to its exposure conditions and larger fragment particle size which reduce the carbonation occurring within the first year.

This underscores that inter-industry collaboration is necessary to maximize CO<sub>2</sub> absorption through cement materials, particularly within the construction industry (Miller et al., 2021). Such collaboration should focus on optimizing concrete design and construction practices, along with implementing effective waste management measures for building demolition waste to enhance carbon sequestration. Moreover, the potential of carbon capture, utilization and storage (CCUS) can contribute 36 % of the reduction for the cement industry to achieve net-zero emissions (IEA, 2024). Many studies have explored the mechanisms and properties of accelerated carbonation in cement materials, including concrete (Alshalif et al., 2021, 2022), cement paste (Castellote et al., 2008; Morandea et al., 2015), slag cement (Mo and Panesar, 2013), and CKD

(Pu et al., 2023). It is essential to promote and adopt relevant technologies to fully realize the potential of cement carbon sinks in mitigating climate change.

**Time-lag effect of cement carbon uptake.** The cement carbon uptake in both current-year and historical-year shows increasing trend (Fig. 1e). The current-year carbon uptake, which represents the absorption of CO<sub>2</sub> by cement produced in the current year, has increased from 9.08 Mt CO<sub>2</sub> yr<sup>-1</sup> in 1928 to 0.54 Gt CO<sub>2</sub> yr<sup>-1</sup> in 2023, with an average annual growth rate of 4.4 %. While the historical-year uptake refers to the absorption of CO<sub>2</sub> by cement produced in the historical year which continues to carbonize in the current year, increasing to 0.42 Gt yr<sup>-1</sup> in 2023. Our projections indicate that in 2024, the current-year uptake and historical-year uptake will reach 0.45 and 0.41 Gt CO<sub>2</sub> yr<sup>-1</sup>, respectively, with increases of 0.9 % and 3.2 % compared to 2023. Current-year uptake is the main contributor to the global cement uptake, with an average annual share of 62.7 % during the 1928-2023 period (Fig. 1f). Mortar and CKD, with their faster carbonation rates, are the primary cement materials contributing to current-year uptake, while concrete is the main driver of historical-year uptake. It is noteworthy that the trend in the share of historical-year uptake aligns with the carbon offset level. In 1944, when cement consumption decreased, the share of historical-year carbon uptake rose to 47.0 %. Conversely, during the period from 2000 to 2007, when cement consumption increased rapidly, the share of historical-year carbon uptake decreased at an average rate of 1.5 %. This pattern suggests that the carbon offset level of cement carbonation sinks will increase as cement production and consumption decline in the future.

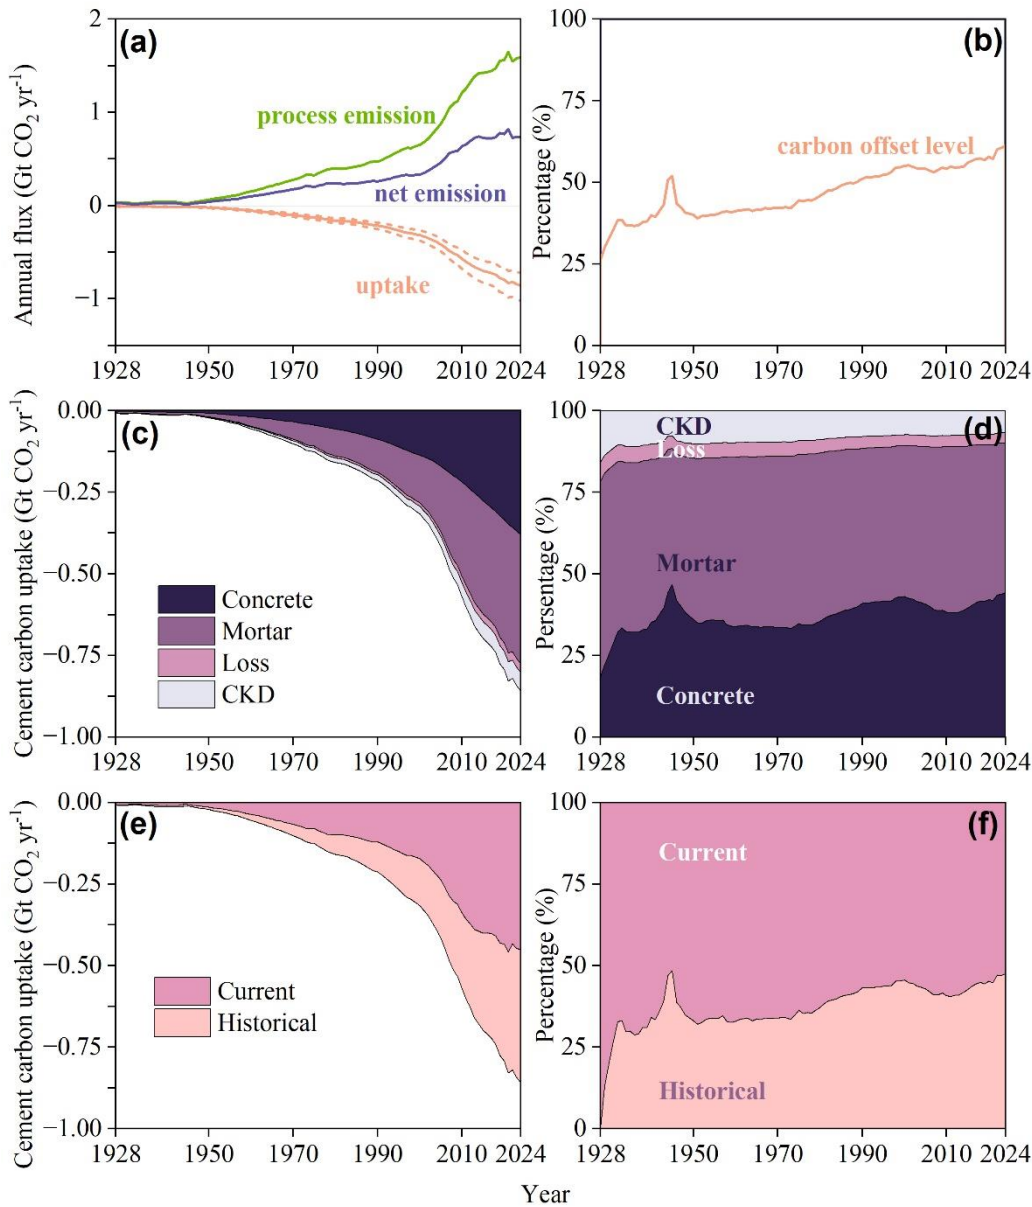

**Figure 1: Global cement CO<sub>2</sub> uptake.** (a) global annual process CO<sub>2</sub> emission and uptake by cement. (b) carbon offset level (share of CO<sub>2</sub> uptake to emission). (c) global annual CO<sub>2</sub> uptake by four cement material. (d) share of CO<sub>2</sub> uptake by four cement materials. (e) global cement annual CO<sub>2</sub> uptake in current and historical year. (f) share of CO<sub>2</sub> uptake by current and historical. The detailed results data are in Supplementary table 3 (available from <https://doi.org/10.5281/zenodo.13827861> Wu et al., 2024).

### 3.2 Spatial distribution of cement carbon uptake

In this study, we gathered carbonation parameters from 42 countries to enrich the cement uptake accounting model. Figure 2 shows the share of cement CO<sub>2</sub> uptake by 42 countries and the rest of world (ROW) during 1928-2023. The cumulative carbon uptake by cement in these 42 countries is 16.60 Gt CO<sub>2</sub> in the past 96 years, accounting for 78.1 % of the global total. Their contributions peaked in 1928 (95.6 %) and were minimal in 1984 (72.9 %). It is evident that cement CO<sub>2</sub> uptake by China and other emerging economies, including South Africa, Indonesia, Vietnam, Korea, India, Turkey, Mexico, and Brazil, have gradually replaced the leading roles played by the USA, Japan, and countries in European like the United Kingdom, Spain,

Italy, Germany, France, Canada, and Belgium after 1982. Specifically, the USA was the largest contributor to cement carbon uptake with an average contribution of 23.6 % between 1928 and 1991. From 1928 to 1966, Germany and the UK were major contributors alongside the USA, with contribution of 8.7 % and 6.9 % respectively. From 1967 to 1982, Japan became the second-largest contributor with an average contribution of 8.2 %. After that, between 1983 and 1991, China replaced Japan with an average contribution of 11.9 %. Since 1992, China has been the country with largest amount of cement carbonation sinks, reaching a maximum contribution of 43.5 % in 2020. Additionally, since 2008, India has been the second-largest contributor, replacing Japan's position during 1992-2006. In 2023, the cement carbon uptake in China and India were 0.33 Gt CO<sub>2</sub> yr<sup>-1</sup> (38.0 % of global, CI: 0.25 - 0.41 Gt yr<sup>-1</sup>) and 0.07 Gt CO<sub>2</sub> yr<sup>-1</sup> (9.1 %, 0.06-0.09 Gt yr<sup>-1</sup>), respectively.

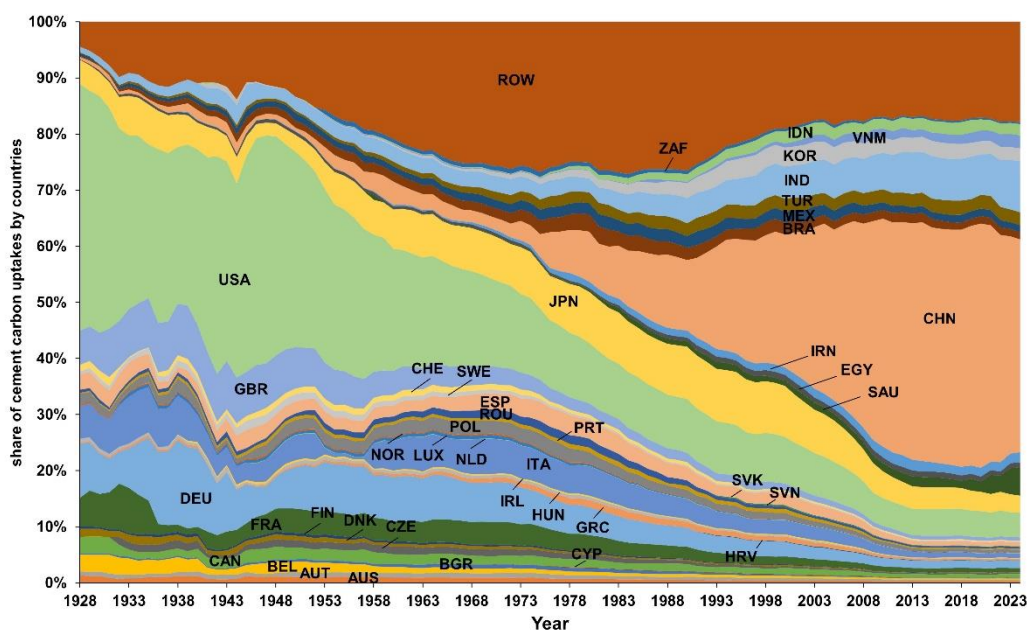

**Figure 2: Share of cement carbon uptake from 1928 to 2023 by 42 countries and rest of world (ROW).** The full names corresponding to the country abbreviations are as follows: AUS (Australia), AUT (Austria), BEL (Belgium), BGR (Bulgaria), CAN (Canada), HRV (Croatia), CYP (Cyprus), CZE (Czechia), DNK (Denmark), FIN (Finland), FRA (France), DEU (Germany), GRC (Greece), HUN (Hungary), IRL (Ireland), ITA (Italy), LUX (Luxembourg), NLD (Netherlands), NOR (Norway), POL (Poland), PRT (Portugal), ROU (Romania), SVK (Slovakia), SVN (Slovenia), ESP (Spain), SWE (Sweden), CHE (Switzerland), GBR (United Kingdom), USA (USA), MEX (Mexico), BRA (Brazil), EGY (Egypt), TUR (Turkey), IRN (Iran), SAU (Saudi Arabia), IND (India), CHN (China), KOR (Korea, Republic of), JPN (Japan), VNM (Vietnam), IDN (Indonesia), ZAF (South Africa).

Based on the clinker production data for 163 countries and regions worldwide and the carbonation parameters for 42 countries, we estimated and projected the carbon uptake across these 163 entities. From the spatial distribution of the cement CO<sub>2</sub> uptake in 2024, We find that the dominant countries of carbon uptake by cement are still distributed in Asia, particularly due to the region's high demand for infrastructure development. China leads the global charge with 326.84 Mt CO<sub>2</sub> (44.0% of the total), followed by India and Saudi Arabia with 78.25 and 43.76 Mt CO<sub>2</sub>, respectively. Japan and South Korea are ranked 7th and 10th with 25.99 and 19.33 Mt CO<sub>2</sub> sequestration, respectively. Southeast Asian countries like Vietnam, Indonesia, Thailand, Philippines, and Laos also contribute significantly, sequestering 19.91, 17.54, 9.34, 7.68 and 5.68 Mt CO<sub>2</sub>, respectively. For

America, the main countries for CO<sub>2</sub> uptake are in USA, Brazil, Mexico, and Canada, with 37.91, 11.03, 10.53 and 5.20 Mt respectively, which ranked 4th, 12th, 14th, and 28th in the world. In Africa, cement carbon uptake is concentrated in Egypt, Nigeria, Algeria and South Africa, which sequester 7.49, 4.30, 4.17 and 2.53 Mt CO<sub>2</sub>, respectively. In Europe, key countries for CO<sub>2</sub> sequestration via cement are Germany, Italy, France, Spain, United Kingdom, and Poland, with amounts of 11.00, 6.82, 6.35, 5.97, 5.11 and 4.46 Mt, respectively.

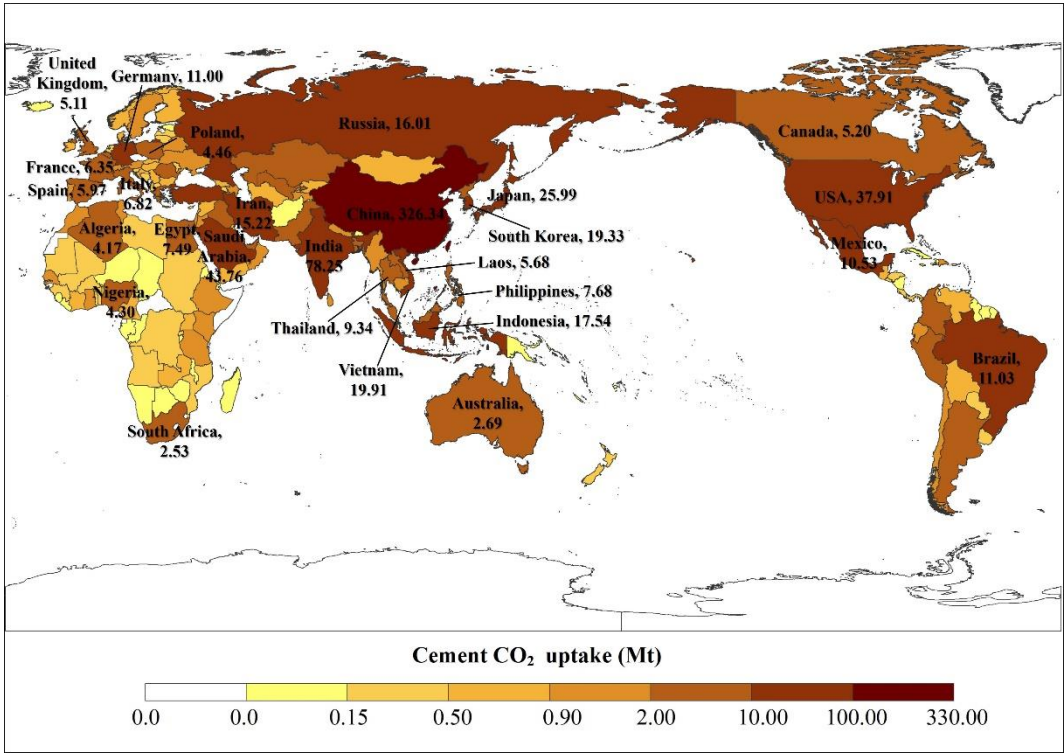

**Figure 3: Spatial distributions of cement CO<sub>2</sub> uptake in 2024.** (The map is copyrighted by the Institute of Geographic Sciences and Resources of the Chinese Academy of Sciences, with no modifications to the base map)

### 3.3 National cement carbon emission and uptake

In this study, we enriched the national cement **process** carbon emission and uptake database. We categorized the countries into two sets according to the trends of their cement **process** carbon emissions curves (Table 2). Group 1 comprises 21 countries where the **process** carbon emissions have shown a peaking trend during 1928-2024. These countries can be further divided into 2 categories based on their net emissions trends: 9 countries with a neutral trend (category a1) and another 12 countries that have peaked but do not exhibit a neutral trend (category a2). Meanwhile, Group 2 includes 21 countries where the **process** carbon emissions are still increasing and have not peaked, but their net emissions trend encompass both peaked (category b1) and non-peaked (category b2) categories, with 4 and 17 countries respectively.

**Table 2: List of country classifications.**

| Groups | Emissions trend | Categories | Net emissions trend | No. of countries |
|--------|-----------------|------------|---------------------|------------------|
|--------|-----------------|------------|---------------------|------------------|

|        |            |    |            |    |
|--------|------------|----|------------|----|
| Group1 | Peaked     | a1 | Neutral    | 9  |
|        |            | a2 | Peaked     | 12 |
| Group2 | Non peaked | b1 | Peaked     | 4  |
|        |            | b2 | Non peaked | 17 |

Figure 4 shows cement **process** carbon emission and uptake for 42 countries from 1928 to 2024. Group 1 (Fig. 4a) predominantly comprises European countries, which were early producers and consumers of cement. In category a1 countries, carbon emissions from cement production have peaked and followed a steady decline, but carbon sinks from cement consumption in these countries have not decreased, resulting in the net-zero or even negative emissions with increasing uptake. For instance, the cement **process** emissions in Australia peaked at 2.91 Mt in 1974 and then decreased at an average rate of 0.8 %. While its cement carbon uptake was 1.17 Mt in 1974 (offset level 40.3 %) and then continued to rise, especially from 2000 to 2024, with an average increase rate of 3.3 %. By 2009, net cement emissions had turned negative with  $-0.02 \text{ Mt CO}_2 \text{ yr}^{-1}$  and reached  $-2.7 \text{ Mt CO}_2 \text{ yr}^{-1}$  in 2024. This is due to the fact that, despite Australia produce less clinker than they used to, their cement consumption has not decreased through substantial clinker imports, with import penetration ratio of 52.8 % in 2023. Countries like Netherlands, Japan, United Kingdom, Hungary, Italy, France, Czech and Germany have exhibited similar trends. In category a2 countries, the net emissions are not yet neutralized, but offsets from cement carbon sequestration effectively reduce actual cement emissions. For instance, in most category a2 countries like Sweden, Luxembourg, Finland, Norway and Belgium, the increase in cement carbon uptake outpaces the growth in **process** carbon emissions, leading to a rapid decline in net emissions after peak year.

In Group 2 countries (Fig. 4b), the cement process emissions have not peaked. However, net emissions have peaked in category b1 countries, such as USA, South Korea, Austria and Denmark, due to carbon sequestration by cement consumption. For instance, a constant demand for cement in USA, **process** carbon emissions are expected to reach 39.57 Mt CO<sub>2</sub> in 2024. However, as the leading importer of cement, USA has shown a peaked trend in net emissions when considering the carbon uptake of cement consumption. Specifically, from 2009 to 2024, the average carbon offset level in USA has been 89.0 %. The non-peaked countries (category b2) are primarily developing countries, and their cement production and consumption have expanded significantly, albeit later than Group 1 countries. China, India, Vietnam, Iran, and Indonesia are notable examples, having experienced rapid growth in cement demand after the 1980s. The cumulative carbon uptake from cement in these countries between 1980 and 2023 accounts for more than 95 % of their totals from 1928 to 2023. Notably, Saudi Arabia has recently witnessed a sharp increase, with 39.21 Mt of cement CO<sub>2</sub> uptake in 2023, an increase of 1.7-fold compared to 2020, likely due to its recent economic diversification policies. Due to the higher production and lower imports in category b2

countries, the trends in process emissions and uptake from cement in these countries are similar, with net emissions increasing  
345 in line with the process emissions. It's worth mentioning that some countries in category b2 have shown decreasing trends in  
recent years. For instance, the cement process emissions in China, Brazil and Ireland have decreased for three consecutive  
years (2022-2024). However, these decreases primarily stem from the decline in cement production rather than from offsets in  
cement carbonation sink, as their carbon uptake also show a decreasing trend with projections of -1.1 %, -1.1 % and -5.0 % in  
2024, respectively. In summary, the carbon offset by cement CO<sub>2</sub> uptake is more significant in peaked countries than in non-  
350 peaked countries. Nowadays, many studies have indicated carbon leakage due to outsourcing from these peaked countries  
(Allevi et al., 2017; Grubb et al., 2022), our results show that the gap in cement process carbon emissions between countries  
will further widen if the carbon uptake were taken into account.

There exists a time lag of cement process carbon emissions and uptake among different countries. The majority of Group 2  
countries are in the initial phases of cement production compared to Group 1 countries. As shown in Figure 5, the trends in  
355 four countries are with comparable cement production levels but vary peak years. Germany and France, which began using  
cement before 1930, experienced a rapid increase in cement process carbon emission and uptake during 1950s-1970s, peaking  
in the 1970s. Korea and Ireland has similar trends, but with about 20-year time lag.



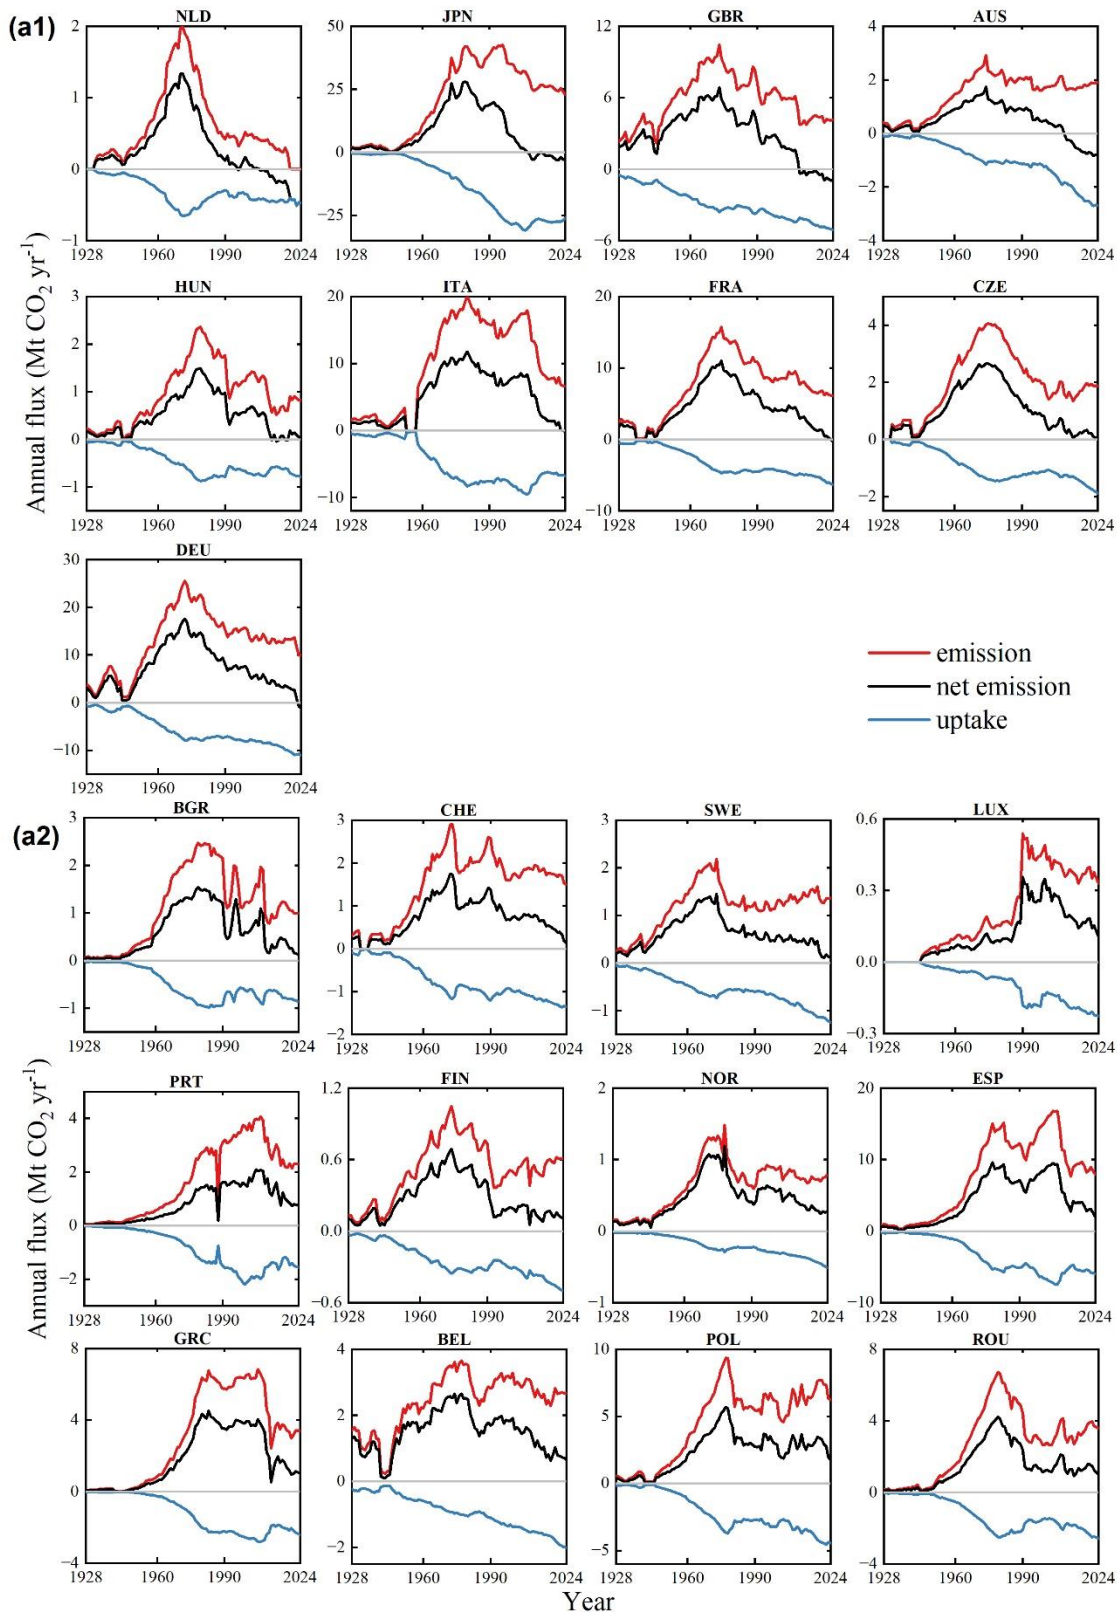

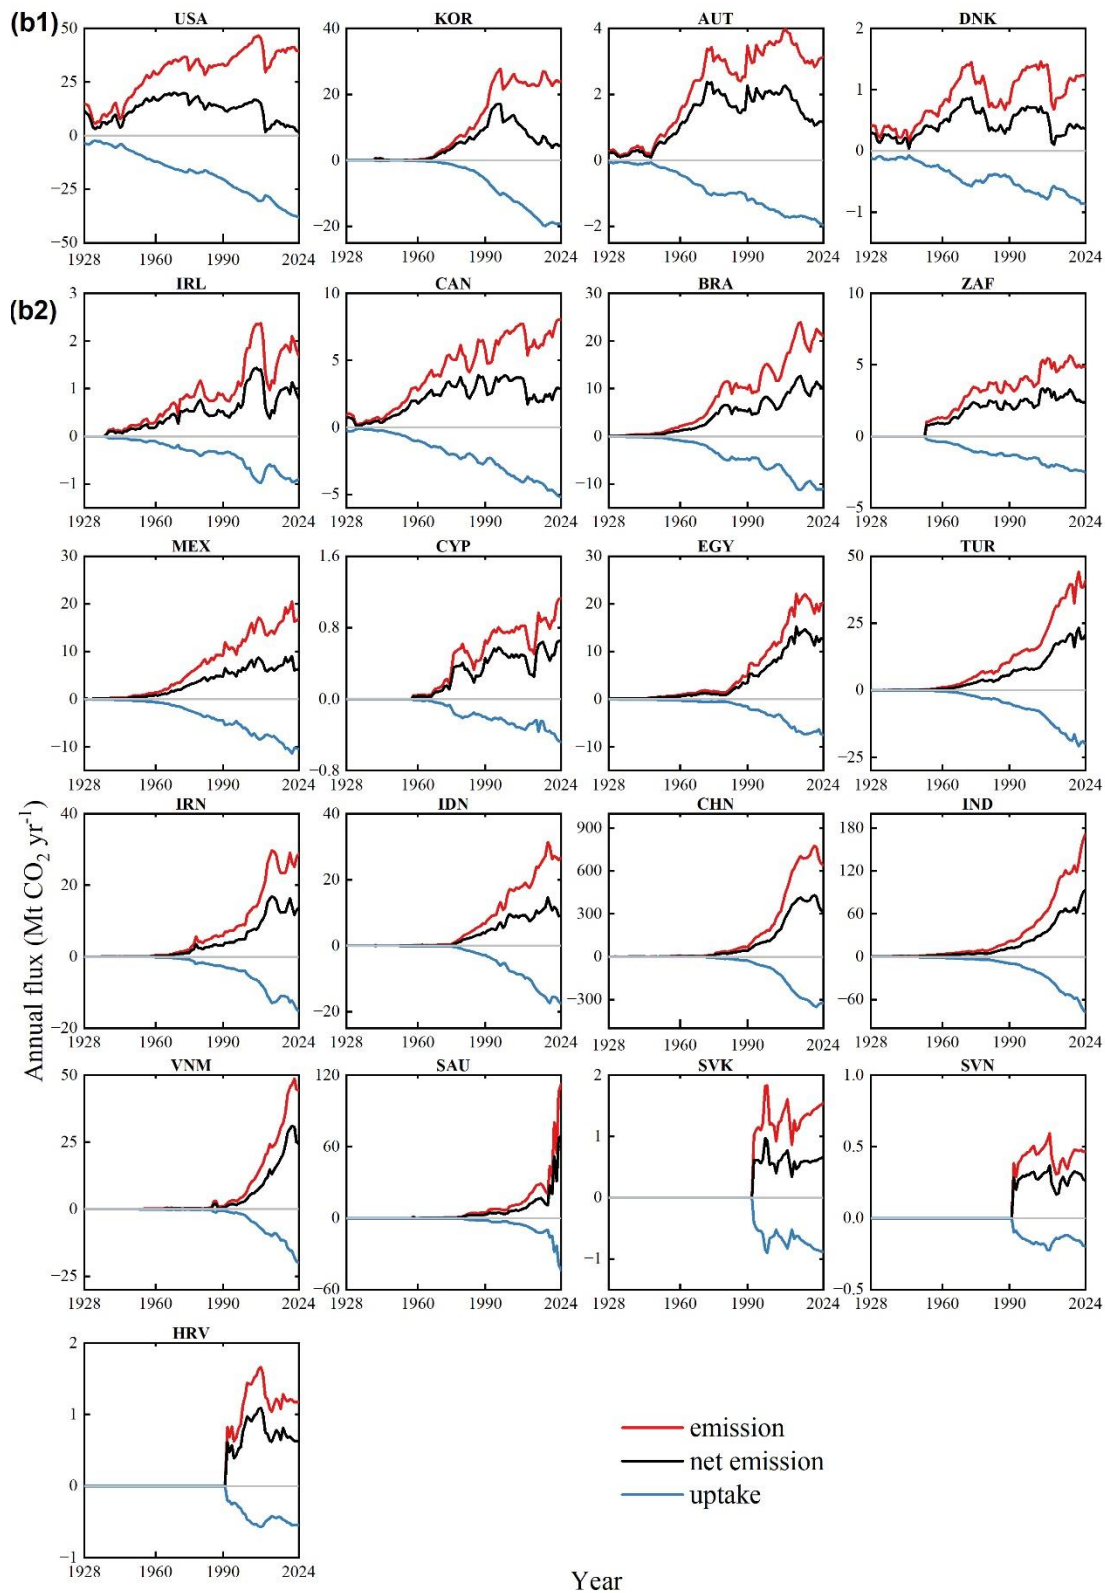

360 **Figure 4: Cement carbon process emission and uptake in 42 countries during 1928-2024.** (a) 21 countries in Group 1 that the cement process emissions have reached peaking. (b) 21 countries in Group 2 with process carbon emissions non-peaked.

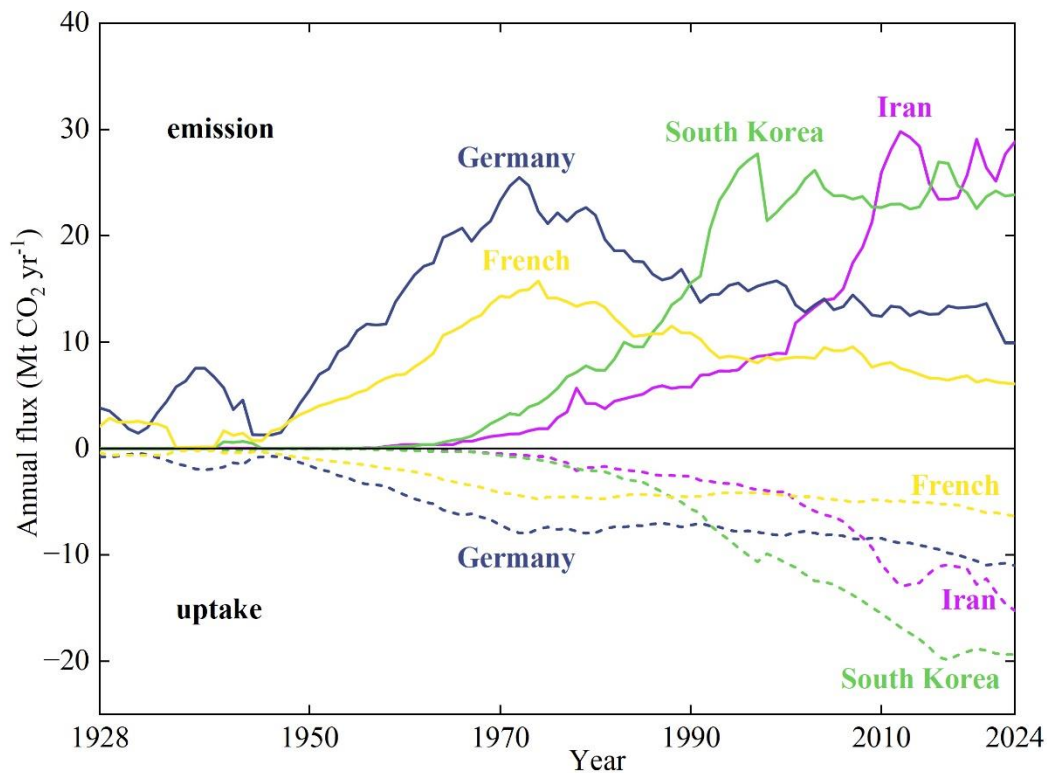

Figure 5: Comparison of trends of process carbon emission and uptake in peaked and non-peaked countries.

#### 4 Data availability

365 All of the original datasets utilized for estimating cement process emission and uptake, as well as the results and associated  
uncertainties in this study, can be accessed on Zenodo at <https://doi.org/10.5281/zenodo.13827861> (Wu et al., 2024).

#### 5 Conclusions

In this study, we further advance research on cement carbon uptake accounting system to enrich both temporal scale (1928-  
2024) and spatial distribution (163 countries and regions) of global cement carbon uptake database, and provide a more precise  
370 bottom-up quantification. Our study reveals that the global and national CO<sub>2</sub> uptake from cement material carbonation cannot  
be negligible. From 1928 to 2023, global cement materials have absorbed a cumulative total of 21.26 Gt CO<sub>2</sub> (95 % CI: 17.93-  
25.17 Gt CO<sub>2</sub>), offsetting 46.1 % of the emissions from production process. In 2023, global carbon uptake by cement is 0.83  
Gt CO<sub>2</sub> yr<sup>-1</sup> (95 % CI: 0.71-1.00 CO<sub>2</sub> yr<sup>-1</sup>), with projections for 2024 at 0.86 Gt CO<sub>2</sub> yr<sup>-1</sup> (95 % CI: 0.73-1.02 CO<sub>2</sub> yr<sup>-1</sup>). The  
updated national-level databases in this study offer more detailed insights of cement carbon uptake. We find emerging  
375 economies are gradually becoming major contributors to global cement carbon uptake since 1982, with increasing cement  
production, particularly in China and India. In contrast, some Southwest Asian countries have achieved net-zero cement carbon  
emissions, having been major contributors from 1928 to 1981. Moreover, according to the characteristics of the carbonation

kinetic, cement carbonation is a dynamic process, and the share of carbon uptake from historical legacy will gradually increase. It means that the carbon offset by cement carbonation will become more significant in relative terms as cement production decreases in the future, driven by carbon reduction policies across various countries.

The accounting of global carbon uptake by cement is continually improving, and refinements in activity data and carbonation parameters are critical in the accurate carbon sequestration inventory. In this study, we focus on updating the country-specific cement consumption activity data and carbonation parameters based on concrete materials in their service stage, leveraging the extensive civil engineering research available. Considering the increasing demand for cement in emerging economics and their significant contribution to global carbon uptake, optimizing these parameters of these countries in the future study is crucial. It is necessary to refine the carbonation parameters related to concrete demolition and secondary use, as well as other cement products. Especially for cement mortar, which consume less but contribute more to cement carbonation uptake. Efforts should be made to optimize methodological, enabling organisations to rely on better estimates for integrating cement carbonation absorption accounting into national GHG inventories.

#### **Author contributions**

LN design the study, collected and assembled the data, prepared, reviewed and edited the manuscript.

SW design the study, conducted modelling, constructed the database, collected and assembled the data.

RMA collected and assembled the data, and revised the manuscript.

ZS collected and assembled the data.

JW revised the manuscript.

FX led the project, design the study, and revised the manuscript.

#### **Competing interests.**

The contact author has declared that none of the authors has any competing interests.

#### **Acknowledgements**

This work was supported by National Natural Science Foundation of China (41977290); the Youth Innovation Promotion Association, Chinese Academy of Sciences (Y202050, 2020201); the Liaoning Xingliao Talents Project (XLYC1907148); the Natural Science Foundation of Liaoning Province (2022-MS-031); the Norwegian Environment Agency (24010001); and the Major Program of Institute for Applied Ecology, Chinese Academy of Sciences (IAEMP202201).

## Reference

- 405 Allevi, E., Oggioni, G., Riccardi, R., and Rocco, M.: Evaluating the carbon leakage effect on cement sector under different climate policies, *Journal of Cleaner Production*, 163, 320–337, <https://doi.org/10.1016/j.jclepro.2015.12.072>, 2017.
- Alshalif, A. F., Irwan, J. M., Othman, N., Al-Gheethi, A. A., Shamsudin, S., and Nasser, I. M.: Optimisation of carbon dioxide sequestration into bio-foamed concrete bricks pores using *Bacillus tequilensis*, *Journal of CO2 Utilization*, 44, 101412, <https://doi.org/10.1016/j.jcou.2020.101412>, 2021.
- 410 Alshalif, A. F., Irwan, J. M., Othman, N., Al-Gheethi, A. A., and Shamsudin, S.: A systematic review on bio-sequestration of carbon dioxide in bio-concrete systems: a future direction, *European Journal of Environmental and Civil Engineering*, 26, 1209–1228, <https://doi.org/10.1080/19648189.2020.1713899>, 2022.
- Ambec, S., Esposito, F., and Pacelli, A.: The economics of carbon leakage mitigation policies, *Journal of Environmental Economics and Management*, 125, 102973, <https://doi.org/10.1016/j.jeem.2024.102973>, 2024.
- 415 Andrew, R. M.: Global CO<sub>2</sub> emissions from cement production, 1928–2018, *Earth System Science Data*, 11, 1675–1710, <https://doi.org/10.5194/essd-11-1675-2019>, 2019.
- Andrew, R. M.: A comparison of estimates of global carbon dioxide emissions from fossil carbon sources, *Earth System Science Data*, 12, 1437–1465, <https://doi.org/10.5194/essd-12-1437-2020>, 2020.
- CEMBUREAU’s Net Zero Roadmap: <https://cembureau.eu/library/reports/cembureau-s-net-zero-roadmap/>, last access: 4
- 420 August 2024.
- Roadmap to Carbon Neutrality: <https://www.cement.org/sustainability/roadmap-to-carbon-neutrality>, last access: 4 August 2024.
- Castellote, M., Andrade, C., Turrillas, X., Campo, J., and Cuello, G. J.: Accelerated carbonation of cement pastes in situ monitored by neutron diffraction, *Cement and Concrete Research*, 38, 1365–1373, <https://doi.org/10.1016/j.cemconres.2008.07.002>, 2008.
- 425 CEIC: <https://www.ceicdata.com/zh-hans>, last access: 25 August 2024.
- Cheng, D., Reiner, D. M., Yang, F., Cui, C., Meng, J., Shan, Y., Liu, Y., Tao, S., and Guan, D.: Projecting future carbon emissions from cement production in developing countries, *Nat Commun*, 14, 8213, <https://doi.org/10.1038/s41467-023-43660-x>, 2023.
- 430 Cement Industry Economic Operation Report 2023: <http://www.ccawz.com/chinacca/>, last access: 4 August 2024.
- Coffetti, D., Crotti, E., Gazzaniga, G., Carrara, M., Pastore, T., and Coppola, L.: Pathways towards sustainable concrete, *Cement and Concrete Research*, 154, 106718, <https://doi.org/10.1016/j.cemconres.2022.106718>, 2022.

- Cox, D. J. and Vladescu, J. C.: Chapter 9 - This math and time thing is cool! Time series decomposition and forecasting behavior, in: *Statistics for Applied Behavior Analysis Practitioners and Researchers*, edited by: Cox, D. J. and Vladescu, J. C., Academic Press, 225–249, <https://doi.org/10.1016/B978-0-323-99885-7.00002-7>, 2023.
- 435
- Davis, S. J., Lewis, N. S., Shaner, M., Aggarwal, S., Arent, D., Azevedo, I. L., Benson, S. M., Bradley, T., Brouwer, J., Chiang, Y.-M., Clack, C. T. M., Cohen, A., Doig, S., Edmonds, J., Fennell, P., Field, C. B., Hannegan, B., Hodge, B.-M., Hoffert, M. I., Ingersoll, E., Jaramillo, P., Lackner, K. S., Mach, K. J., Mastrandrea, M., Ogden, J., Peterson, P. F., Sanchez, D. L., Sperling, D., Stagner, J., Trancik, J. E., Yang, C.-J., and Caldeira, K.: Net-zero emissions energy systems, *Science*, 360, eaas9793, <https://doi.org/10.1126/science.aas9793>, 2018.
- 440
- Doh Dinga, C. and Wen, Z.: China's green deal: Can China's cement industry achieve carbon neutral emissions by 2060?, *Renewable and Sustainable Energy Reviews*, 155, 111931, <https://doi.org/10.1016/j.rser.2021.111931>, 2022.
- ERMCO: ERMCO Statistics 2001 - 2019, ERMCO, 2019.
- Farfan, J., Fasihi, M., and Breyer, C.: Trends in the global cement industry and opportunities for long-term sustainable CCU potential for Power-to-X, *Journal of Cleaner Production*, 217, 821–835, <https://doi.org/10.1016/j.jclepro.2019.01.226>, 2019.
- 445
- Friedlingstein, P., O'Sullivan, M., Jones, M. W., Andrew, R. M., Bakker, D. C. E., Hauck, J., Landschützer, P., Le Quéré, C., Lujikx, I. T., Peters, G. P., Peters, W., Pongratz, J., Schwingshackl, C., Sitch, S., Canadell, J. G., Ciais, P., Jackson, R. B., Alin, S. R., Anthoni, P., Barbero, L., Bates, N. R., Becker, M., Bellouin, N., Decharme, B., Bopp, L., Brasika, I. B. M., Cadule, P., Chamberlain, M. A., Chandra, N., Chau, T.-T.-T., Chevallier, F., Chini, L. P., Cronin, M., Dou, X., Enyo, K., Evans, W., Falk, S., Feely, R. A., Feng, L., Ford, D. J., Gasser, T., Ghattas, J., Gkritzalis, T., Grassi, G., Gregor, L., Gruber, N., Gürses, Ö., Harris, I., Hefner, M., Heinke, J., Houghton, R. A., Hurtt, G. C., Iida, Y., Ilyina, T., Jacobson, A. R., Jain, A., Jarníková, T., Jersild, A., Jiang, F., Jin, Z., Joos, F., Kato, E., Keeling, R. F., Kennedy, D., Klein Goldewijk, K., Knauer, J., Korsbakken, J. I., Körtzinger, A., Lan, X., Lefèvre, N., Li, H., Liu, J., Liu, Z., Ma, L., Marland, G., Mayot, N., McGuire, P. C., McKinley, G. A., Meyer, G., Morgan, E. J., Munro, D. R., Nakaoka, S.-I., Niwa, Y., O'Brien, K. M., Olsen, A., Omar, A. M., Ono, T., Paulsen, M., Pierrot, D., Pockock, K., Poulter, B., Powis, C. M., Rehder, G., Resplandy, L., Robertson, E., Rödenbeck, C., Rosan, T. M., Schwinger, J., Séférian, R., et al.: Global Carbon Budget 2023, *Earth System Science Data*, 15, 5301–5369, <https://doi.org/10.5194/essd-15-5301-2023>, 2023.
- 450
- Goyal, S. and Sharma, D.: CO2 sequestration on cement, in: *Start-Up Creation (Second Edition)*, edited by: Pacheco-Torgal, F., Rasmussen, E., Granqvist, C.-G., Ivanov, V., Kaklauskas, A., and Makonin, S., Woodhead Publishing, 109–142, <https://doi.org/10.1016/B978-0-12-819946-6.00006-0>, 2020.
- 460

- Grubb, M., Jordan, N. D., Hertwich, E., Neuhoff, K., Das, K., Bandyopadhyay, K. R., Asselt, H. van, Sato, M., Wang, R., Pizer, W. A., and Oh, H.: Carbon Leakage, Consumption, and Trade, *Annual Review of Environment and Resources*, 47, 753–795, <https://doi.org/10.1146/annurev-environ-120820-053625>, 2022.
- Guo, R., Wang, J., Bing, L., Tong, D., Ciais, P., Davis, S. J., Andrew, R. M., Xi, F., and Liu, Z.: Global CO<sub>2</sub> uptake by cement  
465 from 1930 to 2019, *Earth System Science Data*, 13, 1791–1805, <https://doi.org/10.5194/essd-13-1791-2021>, 2021.
- Huang, Z., Wang, J., Bing, L., Qiu, Y., Guo, R., Yu, Y., Ma, M., Niu, L., Tong, D., Andrew, R. M., Friedlingstein, P., Canadell, J. G., Xi, F., and Liu, Z.: Global carbon uptake of cement carbonation accounts 1930–2021, *Earth System Science Data*, 15, 4947–4958, <https://doi.org/10.5194/essd-15-4947-2023>, 2023.
- Technology Roadmap - Low-Carbon Transition in the Cement Industry – Analysis: <https://www.iea.org/reports/technology-roadmap-low-carbon-transition-in-the-cement-industry>, last access: 2 August 2024.  
470
- Ji, S., Lee, B., and Yi, M. Y.: Building life-span prediction for life cycle assessment and life cycle cost using machine learning: A big data approach, *Building and Environment*, 205, 108267, <https://doi.org/10.1016/j.buildenv.2021.108267>, 2021.
- Krishna Priya, G. S., Gundre, R., Bandyopadhyay, S., and Seethamraju, S.: Analysis of decarbonization measures for the Indian Cement Sector, *Journal of Environmental Management*, 358, 120860, <https://doi.org/10.1016/j.jenvman.2024.120860>,  
475 2024.
- Kumar, P. and Kaushik, S. K.: Some trends in the use of concrete : Indian scenario, 2003.
- Kurtis, K. E.: Innovations in cement-based materials: Addressing sustainability in structural and infrastructure applications, *MRS Bulletin*, 40, 1102–1109, <https://doi.org/10.1557/mrs.2015.279>, 2015.
- Li, L., Liu, Q., Huang, T., and Peng, W.: Mineralization and utilization of CO<sub>2</sub> in construction and demolition wastes recycling  
480 for building materials: A systematic review of recycled concrete aggregate and recycled hardened cement powder, *Separation and Purification Technology*, 298, 121512, <https://doi.org/10.1016/j.seppur.2022.121512>, 2022.
- Liu, J., Tong, D., Zheng, Y., Cheng, J., Qin, X., Shi, Q., Yan, L., Lei, Y., and Zhang, Q.: Carbon and air pollutant emissions from China’s cement industry 1990–2015: trends, evolution of technologies, and drivers, *Atmospheric Chemistry and Physics*, 21, 1627–1647, <https://doi.org/10.5194/acp-21-1627-2021>, 2021.
- 485 de Lorena Diniz Chaves, G., Siman, R. R., Ribeiro, G. M., and Chang, N.-B.: Synergizing environmental, social, and economic sustainability factors for refuse derived fuel use in cement industry: A case study in Espirito Santo, Brazil, *Journal of Environmental Management*, 288, 112401, <https://doi.org/10.1016/j.jenvman.2021.112401>, 2021.
- Miller, S. A., Habert, G., Myers, R. J., and Harvey, J. T.: Achieving net zero greenhouse gas emissions in the cement industry via value chain mitigation strategies, *One Earth*, 4, 1398–1411, <https://doi.org/10.1016/j.oneear.2021.09.011>, 2021.

- 490 Mo, L. and Panesar, D. K.: Accelerated carbonation – A potential approach to sequester CO<sub>2</sub> in cement paste containing slag and reactive MgO, *Cement and Concrete Composites*, 43, 69–77, <https://doi.org/10.1016/j.cemconcomp.2013.07.001>, 2013.
- Morandau, A., Thiéry, M., and Dangla, P.: Impact of accelerated carbonation on OPC cement paste blended with fly ash, *Cement and Concrete Research*, 67, 226–236, <https://doi.org/10.1016/j.cemconres.2014.10.003>, 2015.
- Muigai, R., Alexander, M. G., and Moyo, P.: Cradle-to-gate environmental impacts of the concrete industry in South Africa, *Journal of the South African Institution of Civil Engineering*, 55, 02–07, 2013.
- 495 Pu, Y., Li, L., Shi, X., Wang, Q., and Abomohra, A.: Recent advances in accelerated carbonation for improving cement-based materials and CO<sub>2</sub> mitigation from a life cycle perspective, *Construction and Building Materials*, 388, 131695, <https://doi.org/10.1016/j.conbuildmat.2023.131695>, 2023.
- Shah, I. H., Miller, S. A., Jiang, D., and Myers, R. J.: Cement substitution with secondary materials can reduce annual global CO<sub>2</sub> emissions by up to 1.3 gigatons, *Nat Commun*, 13, 5758, <https://doi.org/10.1038/s41467-022-33289-7>, 2022.
- 500 Snæbjörnsdóttir, S. Ó., Sigfússon, B., Marieni, C., Goldberg, D., Gislason, S. R., and Oelkers, E. H.: Carbon dioxide storage through mineral carbonation, *Nat Rev Earth Environ*, 1, 90–102, <https://doi.org/10.1038/s43017-019-0011-8>, 2020.
- Wu, S., Niu, L., Wang, J., and Xi, F.: Global and national CO<sub>2</sub> uptake by cement carbonation from 1928 to 2024, <https://doi.org/10.5281/zenodo.13827861>, 2024.
- 505 Xi, F., Davis, S. J., Ciais, P., Crawford-Brown, D., Guan, D., Pade, C., Shi, T., Syddall, M., Lv, J., Ji, L., Bing, L., Wang, J., Wei, W., Yang, K.-H., Lagerblad, B., Galan, I., Andrade, C., Zhang, Y., and Liu, Z.: Substantial global carbon uptake by cement carbonation, *Nature Geosci*, 9, 880–883, <https://doi.org/10.1038/ngeo2840>, 2016.
- Xue, L., Zhang, Z., and Wang, H.: Hydration mechanisms and durability of hybrid alkaline cements (HACs): A review, *Construction and Building Materials*, 266, 121039, <https://doi.org/10.1016/j.conbuildmat.2020.121039>, 2021.

510
